# Supplementary material
Source: publisher site journal article supplement (https://www.spandidos-publications.com/7502/downloadSupplementary)

Figure S1. Bioinformatic analyses based on public databases. Correlation of MALT1 expression with TNM stage, DFS and OS in (A) lung adenocarcinoma and (B) lung squamous cell carcinoma in the GEPIA database. Correlation of MALT1 with (C) macrophages and (D) CD8<sup>+</sup> T cells in cancers in the TIMER database. In the violin plots in A and B, the white dots indicate the median value and black lines the range. In C and D, the red box in the correlation analyses highlights the correlation of MALT1 with macrophages or CD8<sup>+</sup> T cells in patients with LUAD and LUSC. MALT1, mucosa-associated lymphoid tissue lymphoma translocation protein-1; TNM, tumor-node-metastasis; DFS, disease-free survival; OS, overall survival; HR, hazard ratio; TPM, transcripts per million; LUAD, lung adenocarcinoma; LUSC, lung squamous cell carcinoma; Cor, correlation.

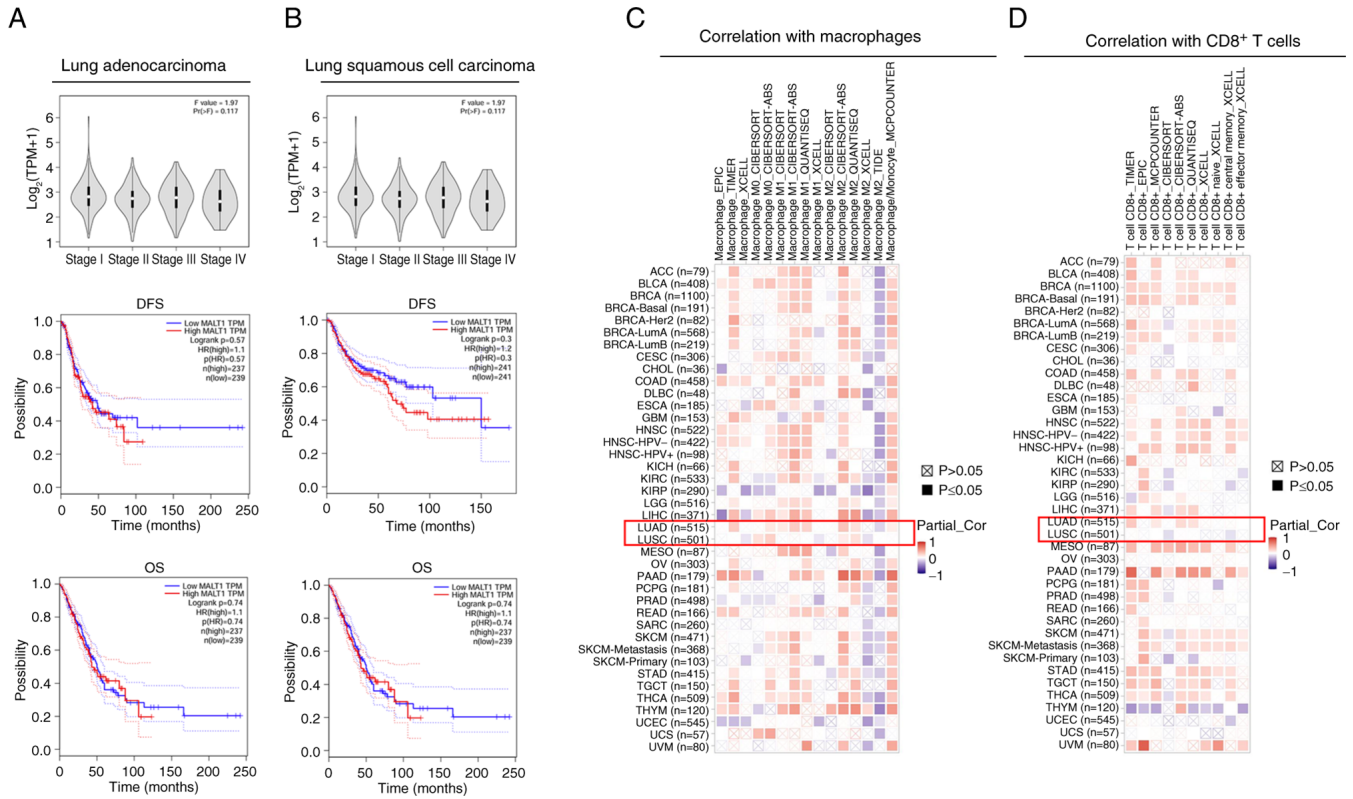

Supplement: Supplementary file 1 [file downloadSupplementary]
